# Supplementary material
Source: PubMed Central journal article supplement (PMC4643359)
Supplement: NIHMS715922-supplement-FINAL_PRODUCTION_FILE__SDC_1.pdf [file NIHMS715922-supplement-FINAL_PRODUCTION_FILE__SDC_1.pdf]

**Table S1.** Participant characteristics for Non-Hispanic Whites only sample.

| <b>Characteristic</b>                  | <b>Total</b><br>(N= 1,614) | <b>DSE</b><br>(N=790) | <b>ILI</b><br>(N=824) | <b>p-value*</b> |
|----------------------------------------|----------------------------|-----------------------|-----------------------|-----------------|
| Women; n (%)                           | 836 (51.8)                 | 411 (52)              | 425 (51.6)            | 0.8572          |
| Age, years; mean (SD)                  | 59.5 (6.9)                 | 59.5 (6.9)            | 59.4 (6.9)            | 0.8593          |
| Baseline measurements                  |                            |                       |                       |                 |
| Diabetes Duration, years; median (IQR) | 5 (2 to 10)                | 5 (2 to 10)           | 5 (2 to 10)           | 0.3904          |
| HbA1c, %; mean (SD)                    | 7.2 (1.14)                 | 7.2 (1.15)            | 7.2 (1.13)            | 0.6672          |
| Insulin use; n (%)                     | 233 (14.4)                 | 119 (15.1)            | 114 (13.8)            | 0.4827          |
| BMI, kg/m <sup>2</sup> ; mean (SD)     | 36.2 (6)                   | 36.2 (6)              | 36.3 (6)              | 0.6600          |
| Smoking; n (%)                         |                            |                       |                       |                 |
| Year 0                                 | 44 (2.7)                   | 23 (2.9)              | 21 (2.5)              | 0.6512          |
| Year 1                                 | 40 (2.6)                   | 19 (2.5)              | 21 (2.7)              | 0.8820          |
| Anti-depressant use; n (%)             |                            |                       |                       |                 |
| Year 0                                 | 331 (20.5)                 | 155 (19.6)            | 176 (21.4)            | 0.3871          |
| Year 1                                 | 323 (21)                   | 161 (21.4)            | 162 (20.6)            | 0.7982          |
| Weight, kg; mean (SD)                  |                            |                       |                       |                 |
| Year 0                                 | 103.7 (19.2)               | 103.3 (18.9)          | 104 (19.5)            | 0.4120          |
| Year 1                                 | 97.9 (19.7)                | 101.9 (19)            | 94 (19.5)             | <0.0001         |
| Absolute change from baseline          | -5.73 (8.26)               | -1.19 (5.51)          | -10.08 (8.12)         | <0.0001         |
| BDI; mean (SD)                         |                            |                       |                       |                 |
| Year 0                                 | 5.3 (4.6)                  | 5.3 (4.4)             | 5.3 (4.8)             | 0.9259          |
| Year 1                                 | 4.6 (5.2)                  | 5.1 (4.9)             | 4.2 (5.4)             | 0.0020          |
| Absolute change from baseline          | -0.63 (4.6)                | -0.22 (4.45)          | -1.02 (4.71)          | 0.0006          |

\* P-values obtained using: independent samples *t* test results for quantitative variables with reported mean (SD); Wilcoxon rank sum test results for quantitative variables with reported median (IQR); and chi-square test results for categorical variables with reported n (%).

**Table S2.** SNP Characteristics for *a priori* SNPs in the overall sample and in the three largest racial/ethnic groups, Non-Hispanic White, Non-Hispanic Black, and Hispanic individuals.

| SNP        | Chr | Position<br>(Build 137) | Nearest<br>Gene | Overall |      |      | White (N=1614) |      |              | Black (N=215) |      |              | Hispanic (N=230) |      |              |
|------------|-----|-------------------------|-----------------|---------|------|------|----------------|------|--------------|---------------|------|--------------|------------------|------|--------------|
|            |     |                         |                 | Allele* | MAF  | N    | Allele*        | MAF  | HWE<br>p-val | Allele*       | MAF  | HWE<br>p-val | Allele*          | MAF  | HWE<br>p-val |
| rs12240047 | 1   | 101181342               | VCAM1           | A/G     | 19.1 | 2118 | A/G            | 20.8 | 0.821        | A/G           | 5.1  | 0.094        | A/G              | 20.9 | 0.048        |
| rs1011319  | 1   | 225597846               | LBR             | G/A     | 19.7 | 2118 | G/A            | 16.3 | 0.202        | A/G           | 48.6 | 0.892        | G/A              | 13.3 | 1.000        |
| rs2230419  | 1   | 225607144               | LBR             | A/G     | 20.0 | 2118 | A/G            | 16.3 | 0.202        | G/A           | 45.8 | 0.891        | A/G              | 13.5 | 1.000        |
| rs60271    | 5   | 104078233               | RAB9BP1         | C/A     | 27.8 | 2118 | C/A            | 32.1 | 0.361        | C/A           | 7.2  | 1.000        | C/A              | 18.7 | 0.515        |
| rs2239110  | 12  | 2629143                 | CACNA1C         | G/A     | 14.8 | 2118 | G/A            | 12.1 | 0.294        | G/A           | 35.1 | 0.765        | G/A              | 13.5 | 0.776        |
| rs216865   | 12  | 6090303                 | VWF             | G/A     | 35.1 | 2118 | G/A            | 33.1 | 0.911        | A/G           | 43.7 | 0.582        | G/A              | 28.7 | 0.198        |
| rs216873   | 12  | 6095274                 | VWF             | G/A     | 20.3 | 2116 | G/A            | 18.7 | 0.870        | G/A           | 34.7 | 0.364        | G/A              | 16.3 | 0.338        |
| rs3125     | 13  | 47408851                | HTR2A           | C/G     | 15.1 | 2117 | C/G            | 14.8 | 0.167        | C/G           | 8.4  | 0.646        | C/G              | 23.9 | 0.282        |

\*Major/minor allele

MAF: Minor allele frequency

HWE: Hardy-Weinberg Equilibrium, or deviation of genotypic frequencies from  $p^2 + 2pq + q^2$ , where  $p$  = the frequency of the major allele and  $q$  = the frequency of the minor allele in a given population.

**Table S3.** Top hits for baseline depressive symptoms in the full cohort and the Non-Hispanic White subsample for BDI scores without medication adjustment (FDR q-value < 0.30). Note: that no adjusted baseline results met the FDR criteria.)

|                           | SNP        | Chip | Chr | Nearest  |       | SE   | p-value  | FDR Q* |
|---------------------------|------------|------|-----|----------|-------|------|----------|--------|
|                           |            |      |     | Gene     | Beta  |      |          |        |
| OVERALL SAMPLE            | rs242037   | MTC  | 12  | EFCAB4B  | -0.73 | 0.16 | 4.77E-06 | 0.249  |
|                           | rs11826956 | MTC  | 11  | LUZP2    | -0.69 | 0.16 | 8.32E-06 | 0.249  |
|                           | rs7633228  | IBC  | 3   | GBE1     | -1.45 | 0.32 | 6.86E-06 | 0.249  |
|                           | rs1503930  | MTC  | 11  | GALNTL4  | -0.64 | 0.15 | 1.55E-05 | 0.290  |
|                           | rs10241252 | MTC  | 7   | VWC2     | -0.64 | 0.15 | 1.98E-05 | 0.290  |
|                           | rs10265687 | MTC  | 7   | VWC2     | -0.64 | 0.15 | 1.98E-05 | 0.290  |
|                           | rs2941878  | MTC  | 5   | GPR98    | 0.83  | 0.20 | 2.66E-05 | 0.290  |
|                           | rs10838650 | MTC  | 11  | C11orf49 | -0.64 | 0.15 | 3.23E-05 | 0.290  |
|                           | rs10142105 | MTC  | 14  | STXBP6   | -0.87 | 0.21 | 3.07E-05 | 0.290  |
|                           | rs16870433 | MTC  | 6   | EPHA7    | -1.41 | 0.33 | 2.44E-05 | 0.290  |
|                           | rs1432622  | IBC  | 5   | ADRB2    | 0.63  | 0.15 | 3.91E-05 | 0.292  |
|                           | rs12201251 | IBC  | 6   | COL9A1   | -0.66 | 0.16 | 3.85E-05 | 0.292  |
| NON-HISPANIC WHITE SAMPLE | rs10838650 | MTC  | 11  | C11orf49 | -0.76 | 0.16 | 2.24E-06 | 0.191  |
|                           | rs4587689  | MTC  | 11  | C11orf49 | -0.78 | 0.17 | 7.71E-06 | 0.225  |
|                           | rs5896     | IBC  | 11  | F2       | -0.91 | 0.21 | 1.08E-05 | 0.225  |
|                           | rs11826956 | MTC  | 11  | LUZP2    | -0.72 | 0.17 | 1.39E-05 | 0.225  |
|                           | rs3136447  | IBC  | 11  | F2       | -0.76 | 0.17 | 1.58E-05 | 0.225  |
|                           | rs2070851  | IBC  | 11  | F2       | -0.75 | 0.17 | 1.59E-05 | 0.225  |
|                           | rs3136457  | IBC  | 11  | F2       | -0.88 | 0.21 | 2.26E-05 | 0.263  |
|                           | rs8043583  | MTC  | 16  | ZCCHC14  | -1.18 | 0.28 | 2.48E-05 | 0.263  |
|                           | rs2070850  | IBC  | 11  | F2       | -0.87 | 0.21 | 3.03E-05 | 0.279  |
|                           | rs12574081 | MTC  | 11  | NR1H3    | -0.84 | 0.20 | 3.81E-05 | 0.279  |
|                           | rs1054736  | MTC  | 3   | PLSCR2   | 0.71  | 0.17 | 4.12E-05 | 0.279  |
|                           | rs363598   | MTC  | 21  | GRIK1    | -0.69 | 0.17 | 4.23E-05 | 0.279  |
|                           | rs13266756 | MTC  | 8   | NSMCE2   | -0.96 | 0.23 | 4.47E-05 | 0.279  |
|                           | rs2275801  | IBC  | 20  | PRKCBP1  | -1.20 | 0.29 | 4.60E-05 | 0.279  |

\* Calculated from the chip-wide results of each group. All p-values are derived from Generalized Estimating Equations models with robust standard errors. False discovery rate (FDR) Q-values calculated using the Q value package (30).

**Figure S1.** Regional Manhattan plots for the association of *KCNE1* with BDI scores without medication adjustment.

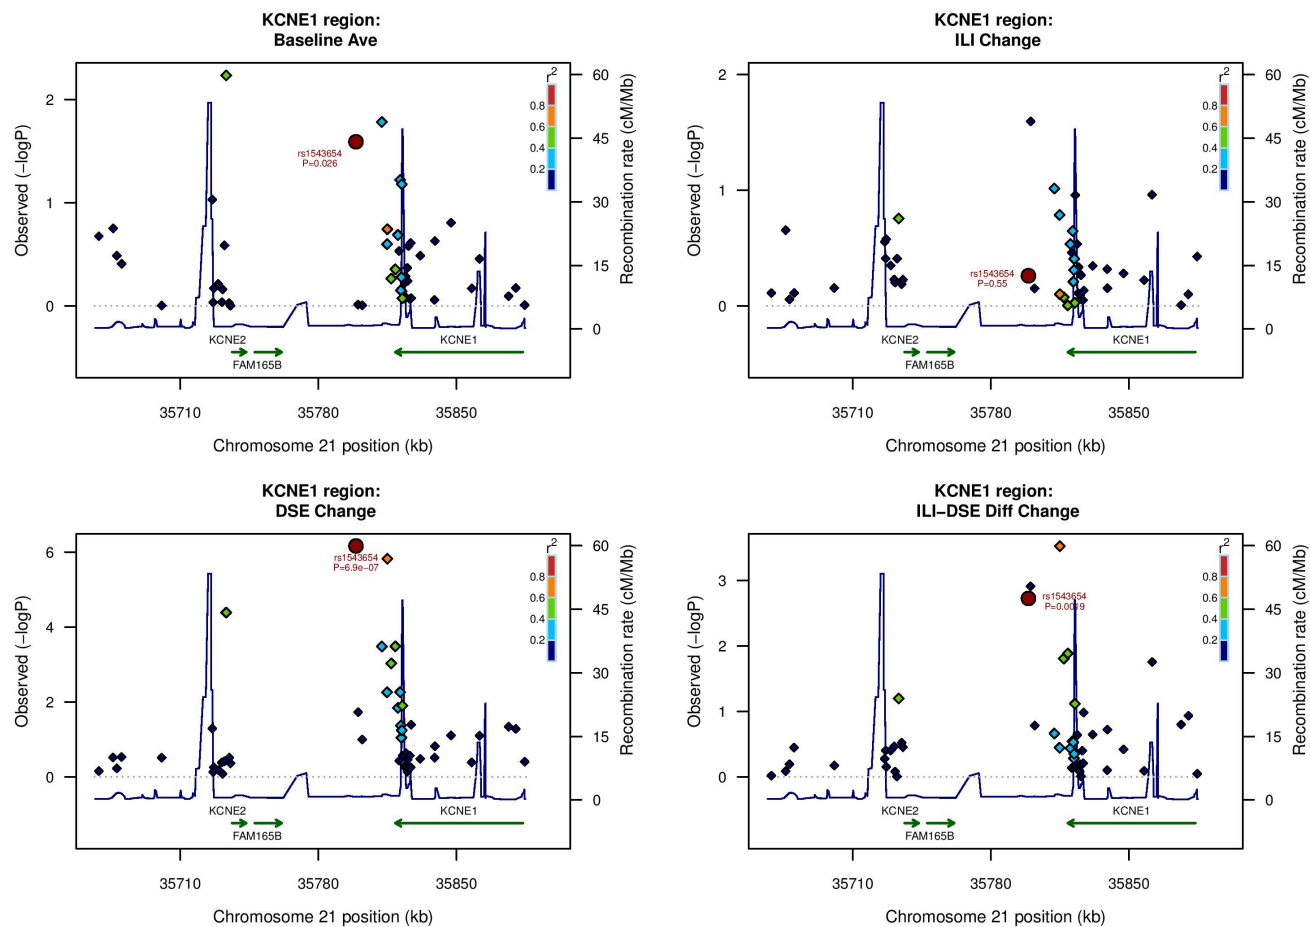

## **Supplemental Digital Content 5.**

### **Appendix: Look AHEAD Research Group at Year 1**

Revised 07/24/2013

#### **Clinical Sites**

The Johns Hopkins Medical Institutions Frederick L. Brancati, MD, MHS<sup>1</sup>; Jeff Honas, MS<sup>2</sup>; Lawrence Cheskin, MD<sup>3</sup>; Jeanne M. Clark, MD, MPH<sup>3</sup>; Kerry Stewart, EdD<sup>3</sup>; Richard Rubin, PhD<sup>3</sup>; Jeanne Charleston, RN; Kathy Horak, RD

Pennington Biomedical Research Center George A. Bray, MD<sup>1</sup>; Kristi Rau<sup>2</sup>; Allison Strate, RN<sup>2</sup>; Brandi Armand, LPN<sup>2</sup>; Frank L. Greenway, MD<sup>3</sup>; Donna H. Ryan, MD<sup>3</sup>; Donald Williamson, PhD<sup>3</sup>; Amy Bachand; Michelle Begnaud; Betsy Berhard; Elizabeth Caderette; Barbara Cerniauskas; David Creel; Diane Crow; Helen Guay; Nancy Kora; Kelly LaFleur; Kim Landry; Missy Lingle; Jennifer Perault; Mandy Shipp, RD; Marisa Smith; Elizabeth Tucker

The University of Alabama at Birmingham Cora E. Lewis, MD, MSPH<sup>1</sup>; Sheikilya Thomas MPH<sup>2</sup>; Monika Safford, MD<sup>3</sup>; Vicki DiLillo, PhD; Charlotte Bragg, MS, RD, LD; Amy Dobelstein; Stacey Gilbert, MPH; Stephen Glasser, MD; Sara Hannum, MA; Anne Hubbell, MS; Jennifer Jones, MA; DeLavallade Lee; Ruth Luketic, MA, MBA, MPH; Karen Marshall; L. Christie Oden; Janet Raines, MS; Cathy Roche, RN, BSN; Janet Truman; Nita Webb, MA; Audrey Wrenn, MAEd

Harvard Center

*Massachusetts General Hospital:* David M. Nathan, MD<sup>1</sup>; Heather Turgeon, RN, BS, CDE<sup>2</sup>; Kristina Schumann, BA<sup>2</sup>; Enrico Cagliero, MD<sup>3</sup>; Linda Delahanty, MS, RD<sup>3</sup>; Kathryn Hayward, MD<sup>3</sup>; Ellen Anderson, MS, RD<sup>3</sup>; Laurie Bissett, MS, RD; Richard Ginsburg, PhD; Valerie Goldman, MS, RD; Virginia Harlan, MSW; Charles McKittrick, RN, BSN, CDE; Alan McNamara, BS; Theresa Michel, DPT, DSc CCS; Alexi Poulos, BA; Barbara Steiner, EdM; Joclyn Tosch, BA

*Joslin Diabetes Center:* Edward S. Horton, MD<sup>1</sup>; Sharon D. Jackson, MS, RD, CDE<sup>2</sup>; Osama Hamdy, MD, PhD<sup>3</sup>; A. Enrique Caballero, MD<sup>3</sup>; Sarah Bain, BS; Elizabeth Bovaird, BSN, RN; Ann Goebel-Fabbri, PhD; Lori Lambert, MS, RD; Sarah Ledbury, MEd, RD; Maureen Malloy, BS; Kerry Ovalle, MS, RCEP, CDE

*Beth Israel Deaconess Medical Center:* George Blackburn, MD, PhD<sup>1</sup>; Christos Mantzoros, MD, DSc<sup>3</sup>; Kristinia Day, RD; Ann McNamara, RN

University of Colorado Health Sciences Center James O. Hill, PhD<sup>1</sup>; Marsha Miller, MS, RD<sup>2</sup>; JoAnn Phillipp, MS<sup>2</sup>; Robert Schwartz, MD<sup>3</sup>; Brent Van Dorsten, PhD<sup>3</sup>; Judith Regensteiner, PhD<sup>3</sup>; Salma Benchekroun MS; Ligia Coelho, BS; Paulette Cohrs, RN, BSN; Elizabeth Daeninck, MS, RD; Amy Fields, MPH; Susan Green; April Hamilton, BS, CCRC; Jere Hamilton, BA; Eugene Leshchinskiy; Michael McDermott, MD; Lindsey Munkwitz, BS; Loretta Rome,

TRS; Kristin Wallace, MPH; Terra Worley, BA

Baylor College of Medicine John P. Foreyt, PhD<sup>1</sup>; Rebecca S. Reeves, DrPH, RD<sup>2</sup>; Henry Pownall, PhD<sup>3</sup>; Ashok Balasubramanyam, MBBS<sup>3</sup>; Peter Jones, MD<sup>3</sup>; Michele Burrington, RD; Chu-Huang Chen, MD, PhD<sup>3</sup>; Allyson Clark, RD; Molly Gee, MEd, RD; Sharon Griggs; Michelle Hamilton; Veronica Holley; Jayne Joseph, RD; Patricia Pace, RD; Julieta Palencia, RN; Olga Satterwhite, RD; Jennifer Schmidt; Devin Volding, LMSW; Carolyn White

University of California at Los Angeles School of Medicine Mohammed F. Saad, MD<sup>1</sup>; Siran Ghazarian, MD<sup>2</sup>; Ken C. Chiu, MD<sup>3</sup>; Medhat Botrous; Michelle Chan, BS; Kati Konersman, MA, RD, CDE; Magpuri Perpetua, RD

The University of Tennessee Health Science Center

*University of Tennessee East.* Karen C. Johnson, MD, MPH; Carolyn Gresham, RN; Stephanie Connelly, MD, MPH; Amy Brewer, RD, MS; Mace Coday, PhD; Lisa Jones, RN; Lynne Lichtermann, RN, BSN; Shirley Vosburg, RD, MPH; and J. Lee Taylor, MEd, MBA

*University of Tennessee Downtown.* Abbas E. Kitabchi, PhD, MD; Helen Lambeth, RN, BSN; Debra Clark, LPN; Andrea Crisler, MT; Gracie Cunningham; Donna Green, RN; Debra Force, MS, RD, LDN; Robert Kores, PhD; Renate

Rosenthal PhD; Elizabeth Smith, MS, RD, LDN; and Maria Sun, MS, RD, LDN;  
and Judith Soberman, MD<sup>3</sup>

University of Minnesota Robert W. Jeffery, PhD<sup>1</sup>; Carolyn Thorson, CCRP<sup>2</sup>; John  
P. Bantle, MD<sup>3</sup>; J. Bruce Redmon, MD<sup>3</sup>; Richard S. Crow, MD<sup>3</sup>; Scott Crow, MD<sup>3</sup>;  
Susan K Raatz, PhD, RD<sup>3</sup>; Kerrin Brelje, MPH, RD; Carolyne Campbell;  
Jeanne Carls, MEd; Tara Carmean-Mihm, BA; Emily Finch, MA; Anna Fox, MA;  
Elizabeth Hoelscher, MPH, RD, CHES; La Donna James; Vicki A. Maddy, BS,  
RD; Therese Ockenden, RN; Birgitta I. Rice, MS, RPh CHES; Tricia Skarphol,  
BS; Ann D. Tucker, BA; Mary Susan Voeller, BA; Cara Walcheck, BS, RD

St. Luke's Roosevelt Hospital Center Xavier Pi-Sunyer, MD<sup>1</sup>; Jennifer Patricio,  
MS<sup>2</sup>; Stanley Heshka, PhD<sup>3</sup>; Carmen Pal, MD<sup>3</sup>; Lynn Allen, MD; Diane Hirsch,  
RNC, MS, CDE; Mary Anne Holowaty, MS, CN

University of Pennsylvania Thomas A. Wadden, PhD<sup>1</sup>; Barbara J. Maschak-  
Carey, MSN, CDE<sup>2</sup>; Stanley Schwartz, MD<sup>3</sup>; Gary D. Foster, PhD<sup>3</sup>; Robert I.  
Berkowitz, MD<sup>3</sup>; Henry Glick, PhD<sup>3</sup>; Shiriki K. Kumanyika, PhD, RD, MPH<sup>3</sup>;  
Johanna Brock; Helen Chomentowski; Vicki Clark; Canice Crerand, PhD; Renee  
Davenport; Andrea Diamond, MS, RD; Anthony Fabricatore, PhD; Louise  
Hesson, MSN; Stephanie Krauthamer-Ewing, MPH; Robert Kuehnel, PhD;  
Patricia Lipschutz, MSN; Monica Mullen, MS, RD; Leslie Womble, PhD, MS;  
Nayyar Iqbal, MD



University of Pittsburgh David E. Kelley, MD<sup>1</sup>; Jacqueline Wesche-Thobaben, RN, BSN, CDE<sup>2</sup>; Lewis Kuller, MD, DrPH<sup>3</sup>; Andrea Kriska, PhD<sup>3</sup>; Janet Bonk, RN, MPH; Rebecca Danchenko, BS; Daniel Edmundowicz, MD<sup>3</sup>; Mary L. Klem, PhD, MLIS<sup>3</sup>; Monica E. Yamamoto, DrPH, RD, FADA<sup>3</sup>; Barb Elnyczky, MA; George A. Grove, MS; Pat Harper, MS, RD, LDN; Janet Krulia, RN, BSN, CDE; Juliet Mancino, MS, RD, CDE, LDN; Anne Mathews, MS, RD, LDN; Tracey Y. Murray, BS; Joan R. Ritchea; Jennifer Rush, MPH; Karen Vujevich, RN-BC, MSN, CRNP; Donna Wolf, MS

The Miriam Hospital/Brown Medical School Rena R. Wing, PhD<sup>1</sup>; Renee Bright, MS<sup>2</sup>; Vincent Pera, MD<sup>3</sup>; John Jakicic, PhD<sup>3</sup>; Deborah Tate, PhD<sup>3</sup>; Amy Gorin, PhD<sup>3</sup>; Kara Gallagher, PhD<sup>3</sup>; Amy Bach, PhD; Barbara Bancroft, RN, MS; Anna Bertorelli, MBA, RD; Richard Carey, BS; Tatum Charron, BS; Heather Chenot, MS; Kimberley Chula-Maguire, MS; Pamela Coward, MS, RD; Lisa Cronkite, BS; Julie Currin, MD; Maureen Daly, RN; Caitlin Egan, MS; Erica Ferguson, BS, RD; Linda Foss, MPH; Jennifer Gauvin, BS; Don Kieffer, PhD; Lauren Lessard, BS; Deborah Maier, MS; JP Massaro, BS; Tammy Monk, MS; Rob Nicholson, PhD; Erin Patterson, BS; Suzanne Phelan, PhD; Hollie Raynor, PhD, RD; Douglas Raynor, PhD; Natalie Robinson, MS, RD; Deborah Robles; Jane Tavares, BS

The University of Texas Health Science Center at San Antonio Steven M. Haffner, MD<sup>1</sup>; Maria G. Montez, RN, MSHP, CDE<sup>2</sup>; Carlos Lorenzo, MD<sup>3</sup>

University of Washington / VA Puget Sound Health Care System Steven E.

Kahn, MB, ChB<sup>1</sup>; Brenda Montgomery, RN, MS, CDE<sup>2</sup>; Robert Knopp, MD<sup>3</sup>;  
Edward Lipkin, MD<sup>3</sup>; Matthew L. Maciejewski, PhD<sup>3</sup>; Dace Trence, MD<sup>3</sup>; Terry  
Barrett, BS; Joli Bartell, BA; Diane Greenberg, PhD; Anne Murillo, BS; Betty Ann  
Richmond, MEd; April Thomas, MPH, RD

Southwestern American Indian Center, Phoenix, Arizona and Shiprock, New

Mexico William C. Knowler, MD, DrPH<sup>1</sup>; Paula Bolin, RN, MC<sup>2</sup>; Tina Killean,  
BS<sup>2</sup>; Cathy Manus, LPN<sup>3</sup>; Jonathan Krakoff, MD<sup>3</sup>; Jeffrey M. Curtis, MD, MPH<sup>3</sup>;  
Justin Glass, MD<sup>3</sup>; Sara Michaels, MD<sup>3</sup>; Peter H. Bennett, MB, FRCP<sup>3</sup>; Tina  
Morgan<sup>3</sup>; Shandiin Begay, MPH; Bernadita Fallis RN, RHIT, CCS; Jeanette  
Hermes, MS,RD; Diane F. Hollowbreast; Ruby Johnson; Maria Meacham, BSN,  
RN, CDE; Julie Nelson, RD; Carol Percy, RN; Patricia Poorthunder; Sandra  
Sangster; Nancy Scurlock, MSN, ANP-C, CDE; Leigh A. Shovestull, RD, CDE;  
Janelia Smiley; Katie Toledo, MS, LPC; Christina Tomchee, BA; Darryl Tonemah  
PhD

University of Southern California Anne Peters, MD<sup>1</sup>; Valerie Ruelas, MSW,

LCSW<sup>2</sup>; Siran Ghazarian Sengardi, MD<sup>2</sup>; Kathryn Graves, MPH, RD, CDE;  
Kati Konersman, MA, RD, CDE; Sara Serafin-Dokhan

**Coordinating Center**

*Wake Forest University Mark A. Espeland, PhD<sup>1</sup>; Judy L. Bahnson, BA<sup>2</sup>; Lynne Wagenknecht, DrPH<sup>3</sup>; David Reboussin, PhD<sup>3</sup>; W. Jack Rejeski, PhD<sup>3</sup>; Alain Bertoni, MD, MPH<sup>3</sup>; Wei Lang, PhD<sup>3</sup>; Gary Miller, PhD<sup>3</sup>; David Lefkowitz, MD<sup>3</sup>; Patrick S. Reynolds, MD<sup>3</sup>; Paul Ribisl, PhD<sup>3</sup>; Mara Vitolins, DrPH<sup>3</sup>; Michael Booth, MBA<sup>2</sup>; Kathy M. Dotson, BA<sup>2</sup>; Amelia Hodges, BS<sup>2</sup>; Carrie C. Williams, MA<sup>2</sup>; Jerry M. Barnes, MA; Patricia A. Feeney, MS; Jason Griffin, BS; Lea Harvin, BS; William Herman, MD, MPH; Patricia Hogan, MS; Sarah Jaramillo, MS; Mark King, BS; Kathy Lane, BS; Rebecca Neiberg, MS; Andrea Ruggiero, MS; Christian Speas, BS; Michael P. Walkup, MS; Karen Wall; Michelle Ward; Delia S. West, PhD; Terri Windham*

### **Central Resources Centers**

*DXA Reading Center, University of California at San Francisco Michael Nevitt, PhD<sup>1</sup>; Susan Ewing, MS; Cynthia Hayashi; Jason Maeda, MPH; Lisa Palermo, MS, MA; Michaela Rahorst; Ann Schwartz, PhD; John Shepherd, PhD*

*Central Laboratory, Northwest Lipid Research Laboratories Santica M.*

*Marcovina, PhD, ScD<sup>1</sup>; Greg Strylewicz, MS*

*ECG Reading Center, EPICARE, Wake Forest University School of Medicine*

*RonaldJ. Prineas, MD, PhD<sup>1</sup>; Teresa Alexander; Lisa Billings; Charles Campbell, AAS, BS; Sharon Hall; Susan Hensley; Yabing Li, MD; Zhu-Ming Zhang, MD*

Diet Assessment Center, University of South Carolina, Arnold School of Public Health, Center for Research in Nutrition and Health Disparities Elizabeth J

Mayer-Davis, PhD<sup>1</sup>; Robert Moran, PhD

Hall-Foushee Communications, Inc.

Richard Foushee, PhD; Nancy J. Hall, MA

### **Federal Sponsors**

National Institute of Diabetes and Digestive and Kidney Diseases: Barbara

Harrison, MS; Van S. Hubbard, MD PhD; Susan Z. Yanovski, MD

National Heart, Lung, and Blood Institute: Lawton S. Cooper, MD, MPH; Jeffrey

Cutler, MD, MPH; Eva Obarzanek, PhD, MPH, RD

Centers for Disease Control and Prevention: Edward W. Gregg, PhD; David F.

Williamson, PhD; Ping Zhang, PhD

---

<sup>1</sup> Principal Investigator

<sup>2</sup> Program Coordinator

<sup>3</sup> Co-Investigator

All other Look AHEAD staff members are listed alphabetically by site.
